# Supplementary material for: Photocuring Hyaluronic Acid/Silk Fibroin Hydrogel Containing Curcumin Loaded CHITOSAN Nanoparticles for the Treatment of MG-63 Cells and ME3T3-E1 Cells
Source: MDPI journal article supplement (doi:10.3390/polym13142302), 2021-07-14
Supplement: s1 [file s1]

Table. S1 The particle size distribution, PDI and zeta potential of CSNPs and CCNPs

| Particles | Particle Size (nm)<br>±SD | Polydispersity (PDI) | Zeta-potential (mV) ±<br>SD |
|-----------|---------------------------|----------------------|-----------------------------|
| CSNPs     | 374.67 ± 10.57            | 0.26 ± 0.05          | 56.37 ± 1.06                |
| CCNPs     | 399.67 ± 12.23            | 0.24 ± 0.03          | 16.57 ± 1.13                |
